# Supplementary material
Source: publisher figshare collection journal article supplement (https://springernature.figshare.com/ndownloader/files/17085197)
Supplement: Supplementary file [file 17085197]

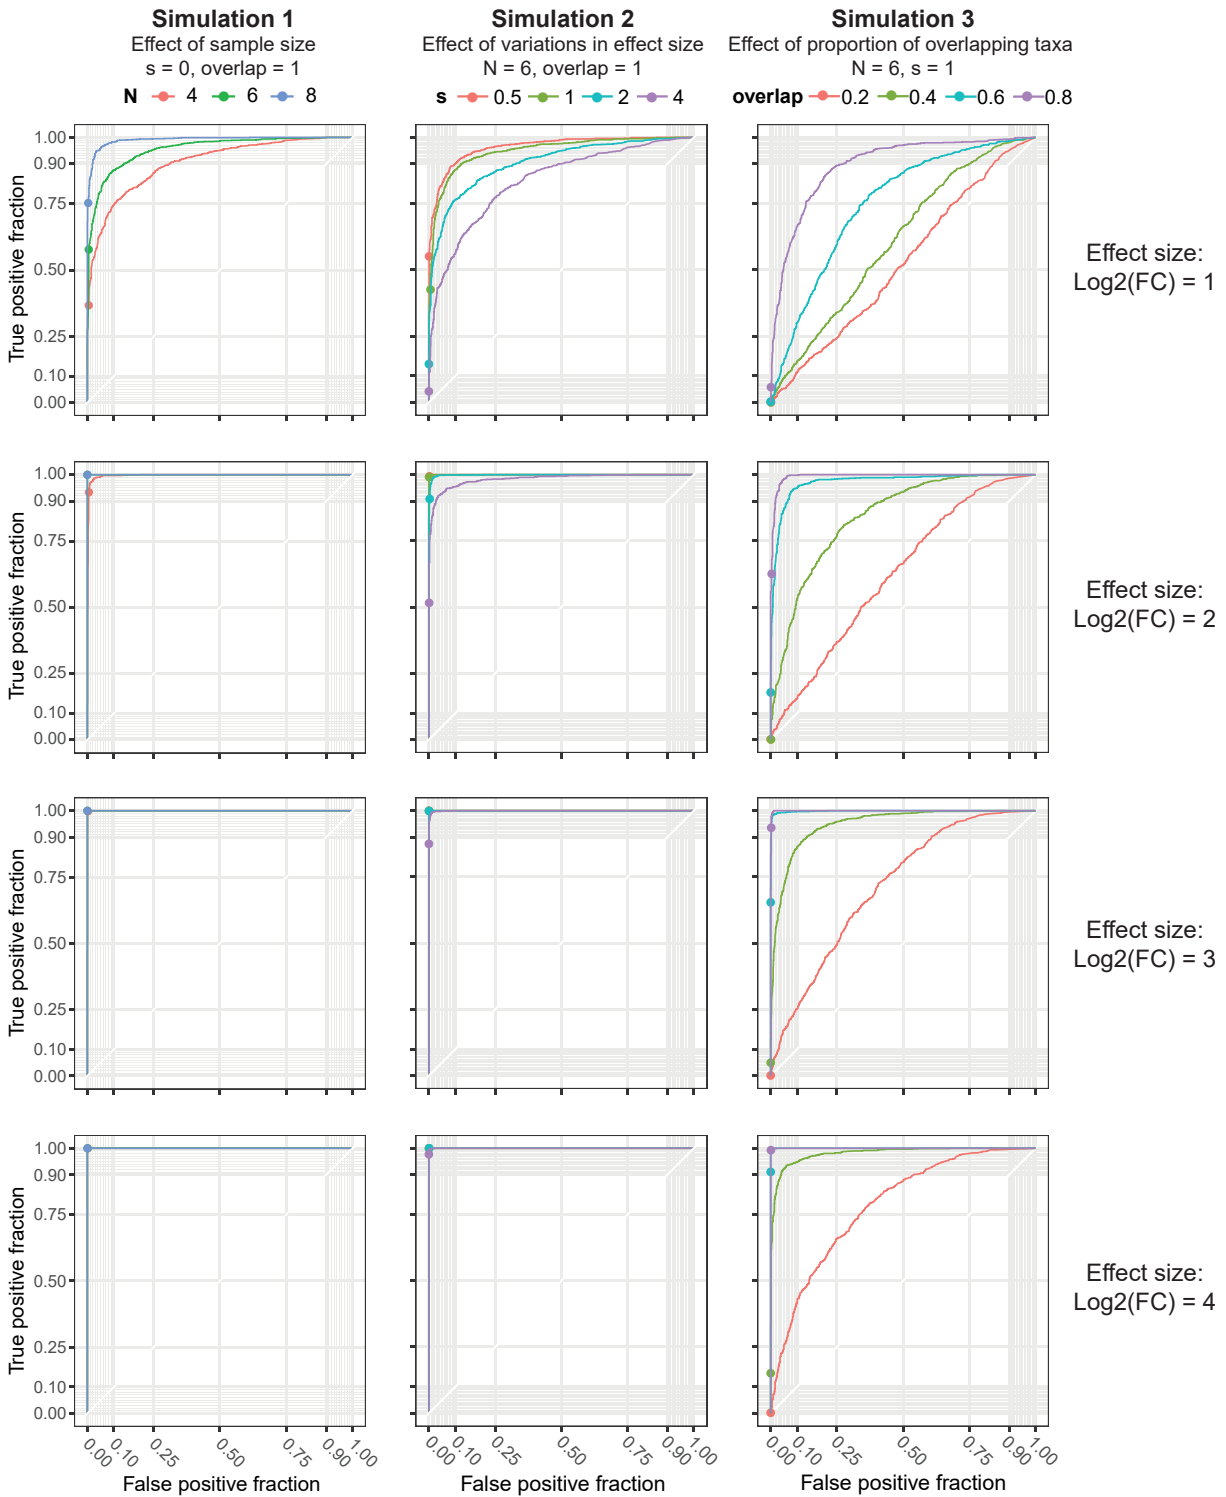

**Figure S1. Receiver operating characteristic (ROC) curves showing the performance of STARMAPs using simulated data.** In each panel, STARMAPs was applied to 2000 simulated pairs of datasets that either shared a set of differentially abundant species (true positives) or involved distinct sets of differentially abundant species (true negatives), and the sensitivity (true positive fraction) and specificity ( $1 - \text{false positive fraction}$ ) of STARMAPs were plotted at given STARMAPs omnibus  $P$  values ranging from 0 to 1. The enlarged point on each curve indicates the sensitivity and specificity estimated at omnibus  $P = 0.05$ . Simulations were done with varying amplitudes of differential abundance [i.e., effect size in  $\text{log}_2(\text{FC})$ ; rows] over a range of parameters representing different scenarios (columns). These varying parameters included the sample size ( $N$ ) for each group, the variance ( $s$ ) of the  $\text{log}_2(\text{FC})$  applied to the second dataset of a given pair of datasets, and the proportion of species commonly found in a given pair of datasets (overlap).
